# Supplementary material
Source: Springer Nature journal article supplement (https://www.springermedizin.de/resource/supplementary/12891_2011_1136_MOESM2_ESM.pdf/9507166)

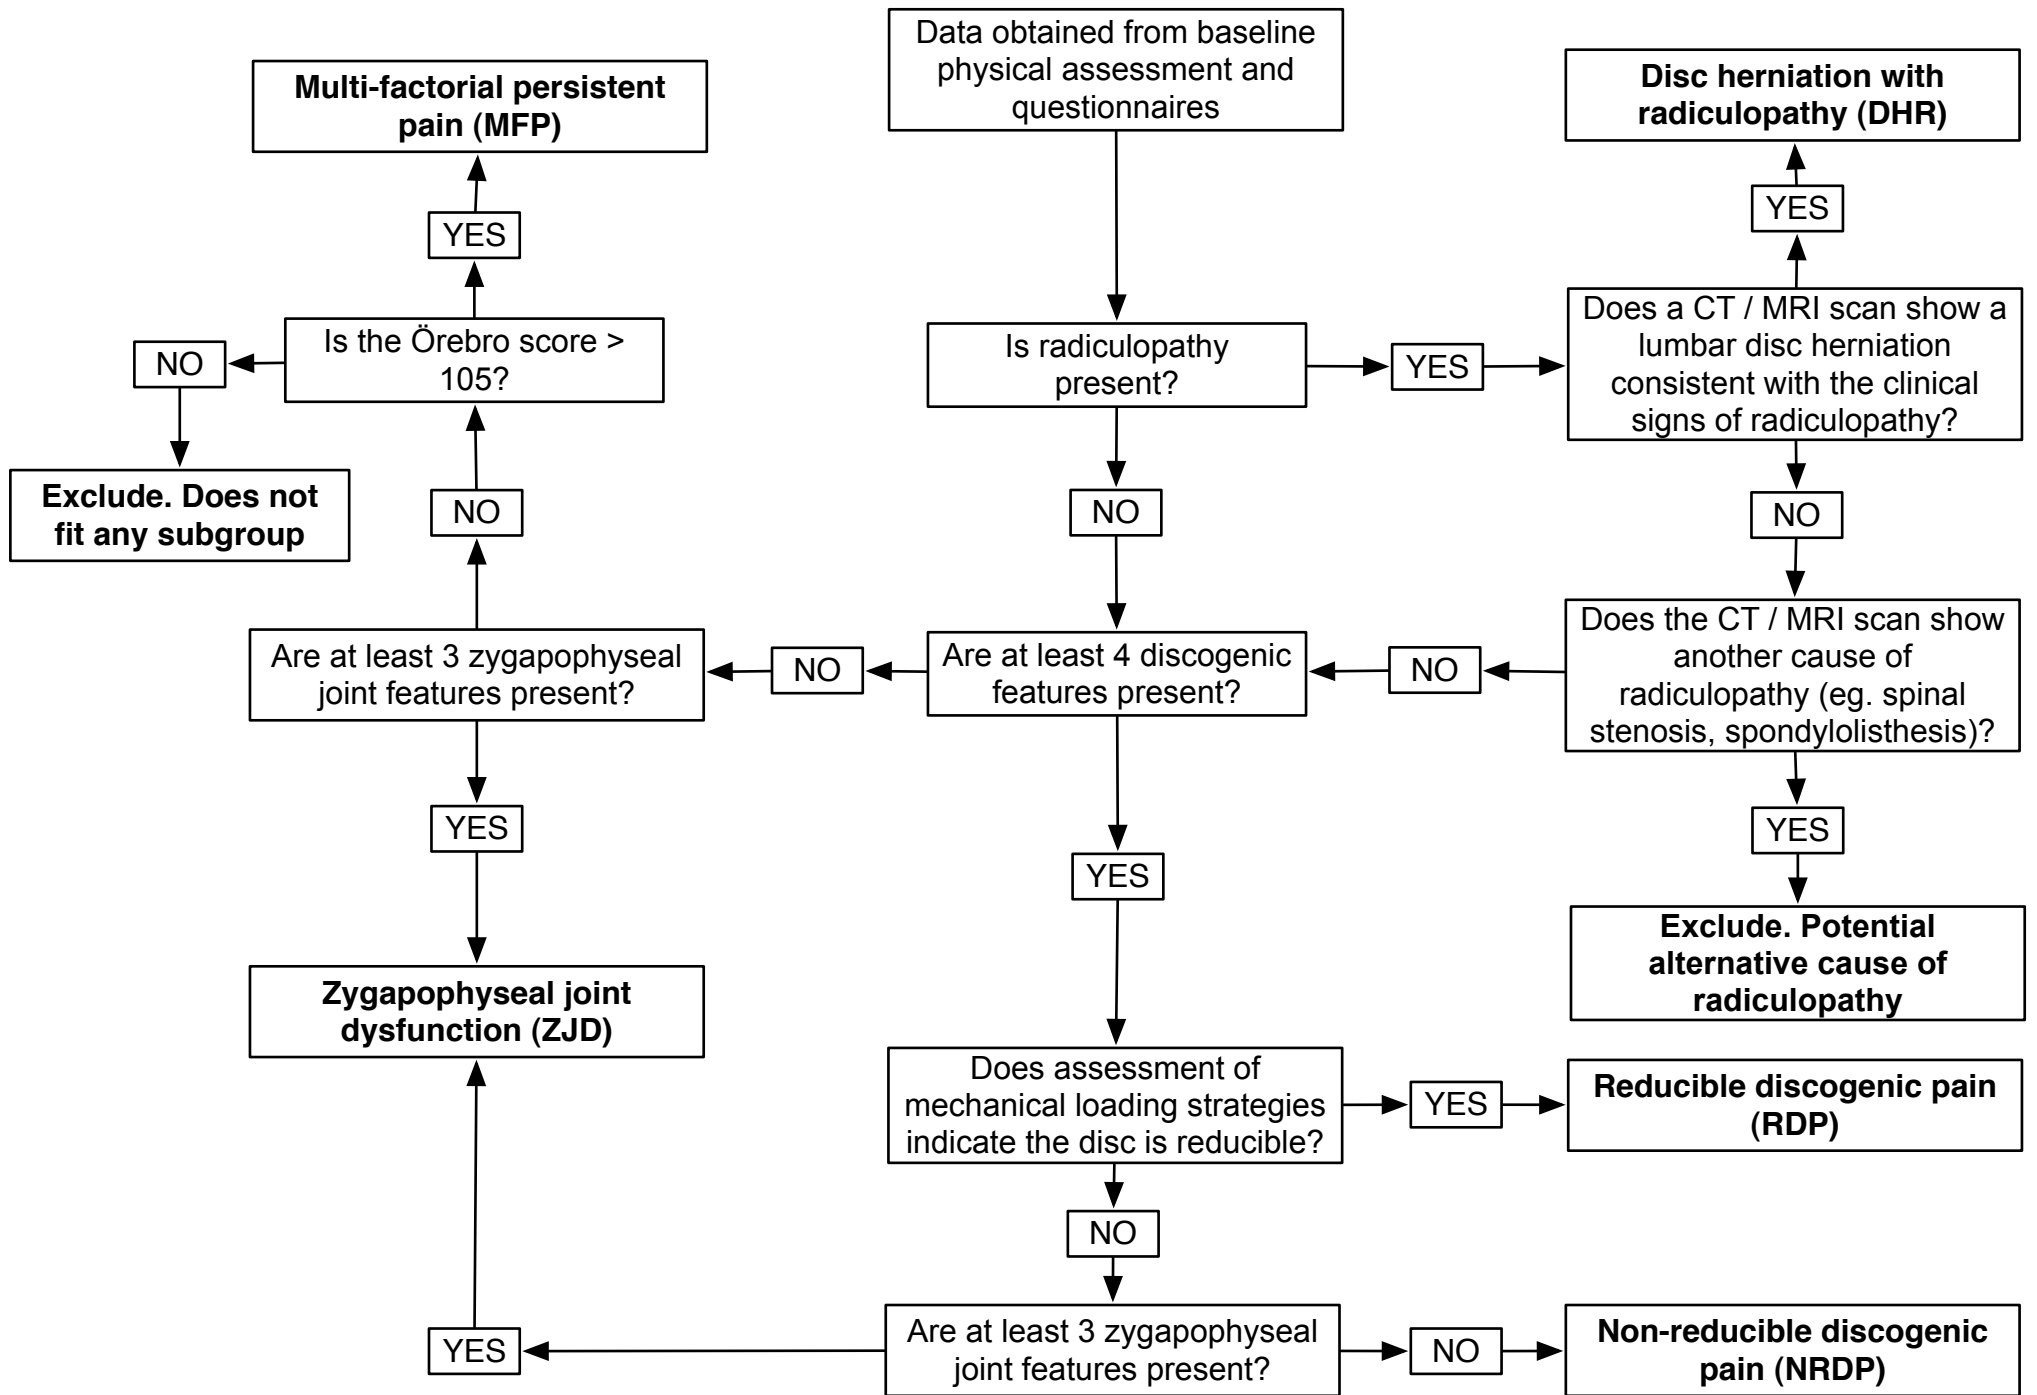

Supplement: MOESM2 [file 9507166]
